# Supplementary material
Source: PubMed Central journal article supplement (PMC7106320)
Supplement: mmc1.pdf [file mmc1.pdf]

**Supplementary Table S1: Number of co-infections for different respiratory viruses in included studies**

|    | Study name                               | Sample size | No. RVIs found | No Co-infects | Flu A     | RSV        | RV        | AdV       | hMPV | hBoV      | hCoV      | PIV | Highest Co-infection | Severity |
|----|------------------------------------------|-------------|----------------|---------------|-----------|------------|-----------|-----------|------|-----------|-----------|-----|----------------------|----------|
| 1  | Richard et al., <sup>30</sup>            | 180         | 173            | 44            | 5         | <b>36</b>  | <b>22</b> | 0         | 8    | 0         | 5         | 0   | 14                   | ↑        |
| 2  | Cilla et al., <sup>21</sup>              | 315         | 226            | 61            | 7         | <b>34</b>  | 9         | 1         | 8    | <b>37</b> | 8         | 16  | 14                   | ↑        |
| 3  | Huguenin et al., <sup>19</sup>           | 152         | 138            | 85            | 1         | <b>54</b>  | 10        | <b>30</b> | 15   | 28        | 1         | 17  | 26                   | ↓        |
| 4  | Franz et al., <sup>22</sup>              | 404         | 315            | 127           | 1         | <b>29</b>  | 30        | 19        | 2    | <b>19</b> | 6         | 5   | 14                   | ↑        |
| 5  | Drews et al., <sup>25</sup>              | 4,336       | 1339           | 67            | <b>30</b> | 21         | 23        | 12        | 0    | 0         | <b>22</b> | 12  | 10                   | ↑        |
| 6  | Martin et al., <sup>20</sup>             | 893         | 563            | 103           | 25        | <b>55</b>  | 0         | <b>59</b> | 18   | 0         | 30        | 25  | 24                   | ↓        |
| 7  | Boivin et al., <sup>23</sup>             | 265         | 164            | 23            | <b>21</b> | <b>22</b>  | 0         | 3         | 12   | 0         | 0         | 0   | 18                   | ↑        |
| 8  | Camargo et al., <sup>35</sup>            | 159         | 104            | 9             | <b>9</b>  | 2          | 2         | <b>4</b>  | 2    | 0         | 0         | 0   | 4                    | ↓        |
| 9  | Venter et al., <sup>29</sup>             | 610         | 510            | 279           | 11        | 70         | 95        | 20        | 20   | 26        | 22        | 15  | ?                    | ↓        |
| 10 | O'Callaghani-Gordo et al., <sup>26</sup> | 333         | 185            | 30            | 11        | 0          | <b>21</b> | <b>17</b> | 6    | 0         | 0         | 3   | 9                    | ↑        |
| 11 | Rhedin et al., <sup>43</sup>             | 502         | 309            | 45            | 12        | 1          | <b>30</b> | 11        | 1    | <b>18</b> | 11        | 9   | 9                    | ↓        |
| 12 | Marcone et al., <sup>27</sup>            | 620         | 476            | 61            | 3         | <b>31</b>  | <b>48</b> | 0         | 12   | 0         | 0         | 5   | 30                   | ↑        |
| 13 | Kouni et al., <sup>24</sup>              | 611         | 397            | 161           | <b>37</b> | <b>112</b> | 31        | 14        | 4    | 5         | 0         | 46  | 29                   | ↑        |
| 14 | Echneque et al., <sup>32</sup>           | 1,192       | 666            | 49            | <b>24</b> | 13         | <b>28</b> | 13        | 1    | 0         | 1         | 8   | 17                   | ↑        |
| 15 | Libster et al., <sup>38</sup>            | 251         | 251            | 47            | <b>47</b> | <b>10</b>  | <b>10</b> | 7         | 6    | 0         | 1         | 8   | 10                   | ↑        |

**Notes:** RVIs - respiratory virus infections, RSV - respiratory syncytial virus, RV - rhino virus, hMPV – human metapneumovirus, hCoV - human coronavirus, Flu A/B - influenza A or B, AdV - adenovirus, PIV1-4 - parainfluenza virus types 1 to 4. ↑ Study reported increased risk associated with co-infections, ↓ study found co-infections reduced severity, ? – number not given. In bold is the co-infection pair that was found to be the most predominant by the study and the actual number of such co-infection is provided in column “Highest Co-infection”. The number of studies in this table is less than the number of studies included in the review because some of the included studies did not give details of the number of specific viruses involved in co-infections.

## Supplementary Table S2: Influenza virus single and multiple infections and disease severity

| Study name                      | Test                         | Age                  | Primary virus | Co-infection                                                         | Admission to GW    |          | Admission to ICU   |          | Bronchiolitis       |          | Pneumonia          |          |
|---------------------------------|------------------------------|----------------------|---------------|----------------------------------------------------------------------|--------------------|----------|--------------------|----------|---------------------|----------|--------------------|----------|
|                                 |                              |                      |               |                                                                      | OR (95% CI)        | <i>p</i> | OR (95% CI)        | <i>p</i> | OR (95% CI)         | <i>p</i> | OR (95% CI)        | <i>p</i> |
| Venter et al., <sup>29</sup>    | RT-PCR<br>Direct IF<br>ELISA | <5 yrs               | Flu A         | RSV A/B, RV, AdV,<br>hMPV, hCOV, hBOV,<br>PIV1-3                     | 1.31 (0.19 – 9.10) | 0.73     |                    |          |                     |          |                    |          |
| Singleton et al., <sup>28</sup> | QRT-PCR                      | <3 yrs               | Flu A/B       | RSV A/B, RV, AdV,<br>hMPV, hCOV, hBOV,<br>PIV1-3                     | 1.01 (0.21 – 4.96) | 0.99     |                    |          | 0.43 (0.18-1.0)     | 0.05*    | 0.77 (0.32 – 1.9)  | 0.56     |
| Boivin et al., <sup>23</sup>    | RT-PCR                       | <3 yrs               | Flu A         | RSV A/B, AdV,<br>hMPV, PIV1-4                                        |                    |          |                    |          | 4.69 (1.38 – 15.95) | 0.01*    | 0.73 (0.25 – 2.11) | 0.56     |
| Do et al., <sup>31</sup>        | RT-PCR                       | <13 yrs              | Flu A         | RSV A/B, RV, AdV,<br>hMPV, hCOV 229E,<br>NL63, OC43, hBOV,<br>PIV1-3 |                    |          | 1.88 (0.22 – 15.9) | 0.56     |                     |          |                    |          |
| Camargo et al., <sup>35</sup>   | RT-PCR                       | Children<br>& adults | Flu A         | Flu A, RSV                                                           |                    |          | 0.70 (0.07 – 7.2)  | 0.77     |                     |          |                    |          |
| Libster et al., <sup>38</sup>   | RT-PCR                       | <18 yrs              | Flu A         | RSV A/B, AdV,<br>PIV1-4                                              |                    |          | 1.43 (0.67 – 3.10) | 0.36     |                     |          |                    |          |
| Rhedin et al., <sup>43</sup>    | RT-PCR                       | <17 yrs              | Flu A         | RSV A/B, RV, AdV,<br>hMPV, hCOV, hBOV,<br>PIV1-3                     |                    |          | 1.38 (0.26 – 7.32) | 0.71     |                     |          |                    |          |
| Echenique et al., <sup>32</sup> | RT-PCR                       | Children<br>& adults | Flu A         | RSV A/B, RV, AdV,<br>hMPV, hCOV, hBOV,<br>PIV1-3                     |                    |          | 1.72 (0.65 – 4.57) | 0.27     |                     |          |                    |          |

Notes: RSV - respiratory syncytial virus, RV - rhino virus, hMPV – human metapneumovirus, hCoV - human coronavirus, Flu A/B - influenza A or B, AdV - adenovirus, PIV1-3 - parainfluenza virus types 1 to 3, EV – Enterovirus, HI: Hemagglutination inhibition assay, . ICU - intensive care unit. IF- Immunofluorescence test. RT-PCR - Real time polymerase chain reaction. All odds ratios were calculated with single viral infections as the baseline. \* Statistically significant at  $p < 0.05$ .
